# Supplementary material for: GOATOOLS: A Python library for Gene Ontology analyses
Source: PubMed Central journal article supplement (PMC6052049; doi:10.1038/s41598-018-28948-z), 2018-07-18
Supplement: 41598_2018_28948_MOESM1_ESM.pdf [file 41598_2018_28948_MOESM1_ESM.pdf]

**GOATOOLS: A Python library for Gene Ontology analyses**  
Supplemental Material

D. V. Klopfenstein, Liangsheng Zhang, Brent S. Pedersen, Fidel Ramírez, Alex Warwick Vesztrocy, Aurélien Naldi, Christopher J. Mungall, Jeffrey M. Yunes, Olga Botvinnik, Mark Weigel, Will Dampier, Christophe Dessimoz, Patrick Flick, and Haibao Tang

## Supplemental Tables

Immune Summary in the *Consistent Increase* Gjoneska cluster with DAVID version 6.7 released Jan 2010

| dcnt | info | D | GO         | Description                                                                                        | GOATOOL  | DAVID6.7 | /125 | /113 |
|------|------|---|------------|----------------------------------------------------------------------------------------------------|----------|----------|------|------|
| 1796 | 6.4  | 1 | GO:0002376 | immune system process                                                                              | 5.28e-07 | 7.96e-20 | 64   | 95   |
| 1128 | 6.6  | 3 | GO:0002682 | regulation of immune system process                                                                | *        | 3.03e-08 | 0    | 41   |
| 835  | 6.9  | 2 | GO:0006955 | immune response                                                                                    | 7.84e-04 | 2.12e-17 | 18   | 62   |
| 596  | 7.2  | 4 | GO:0050776 | regulation of immune response                                                                      | *        | 1.19e-07 | 0    | 29   |
| 523  | 7.0  | 4 | GO:0002684 | + reg. of immune sys. process                                                                      | *        | 7.65e-07 | 0    | 29   |
| 502  | 7.6  | 2 | GO:0002252 | immune effector process                                                                            | *        | 6.12e-05 | 0    | 21   |
| 495  | 12.2 | 4 | GO:0002520 | immune system development                                                                          | *        | 1.20e-02 | 0    | 28   |
| 464  | 7.4  | 4 | GO:0001817 | regulation of cytokine production                                                                  | 7.84e-04 | 1.71e-03 | 8    | 19   |
| 443  | 7.8  | 3 | GO:0045321 | leukocyte activation                                                                               |          | 1.02e-02 | 0    | 23   |
| 352  | 8.5  | 4 | GO:0048534 | hematopoietic or lymphoid organ devel.                                                             | *        | 1.10e-02 | 0    | 27   |
| 334  | 7.5  | 5 | GO:0050778 | + reg. of immune response                                                                          | *        | 2.47e-07 | 0    | 24   |
| 333  | 8.0  | 4 | GO:0002697 | regulation of immune effector process                                                              | *        | 2.05e-03 | 0    | 14   |
| 333  | 9.1  | 5 | GO:0030097 | hemopoiesis                                                                                        | *        | 3.44e-02 | 0    | 24   |
| 288  | 7.5  | 4 | GO:0045087 | innate immune response                                                                             | 3.50e-07 | 4.73e-02 | 51   | 13   |
| 256  | 9.3  | 3 | GO:0002443 | leukocyte mediated immunity                                                                        | *        | 2.28e-03 | 0    | 14   |
| 247  | 7.4  | 5 | GO:0002694 | regulation of leukocyte activation                                                                 |          | 1.33e-02 | 0    | 16   |
| 226  | 8.5  | 3 | GO:0002250 | adaptive immune response                                                                           | 4.36e-03 | 9.48e-03 | 13   | 13   |
| 211  | 9.4  | 4 | GO:0002460 | adaptive immune rsp. based on somatic re-combin. of immune rx. built w/Ig domains                  | *        | 9.48e-03 | 0    | 13   |
| 205  | 7.6  | 6 | GO:0051249 | regulation of lymphocyte activation                                                                |          | 4.28e-02 | 0    | 14   |
| 189  | 7.9  | 4 | GO:0006954 | inflammatory response                                                                              | 5.09e-07 | 7.58e-07 | 41   | 27   |
| 183  | 9.6  | 4 | GO:0002449 | lymphocyte mediated immunity                                                                       | *        | 3.42e-02 | 0    | 11   |
| 179  | 7.9  | 6 | GO:0002253 | activation of immune response                                                                      |          | 2.90e-03 | 0    | 13   |
| 175  | 8.6  | 5 | GO:0002703 | regulation of leukocyte mediated immunity                                                          | *        | 5.02e-04 | 0    | 13   |
| 162  | 7.9  | 5 | GO:0001819 | + reg. of cytokine production                                                                      | *        | 7.36e-05 | 0    | 15   |
| 159  | 8.1  | 5 | GO:0002764 | immune response-regulating signaling pw.                                                           |          | 8.90e-03 | 0    | 10   |
| 149  | 8.9  | 3 | GO:0002263 | cell activation in immune response                                                                 |          | 1.74e-02 | 0    | 8    |
| 146  | 8.8  | 5 | GO:0002819 | regulation of adaptive immune response                                                             | *        | 6.60e-05 | 0    | 13   |
| 144  | 8.9  | 4 | GO:0002366 | leukocyte activation in immune response                                                            |          | 1.74e-02 | 0    | 8    |
| 143  | 8.1  | 7 | GO:0002757 | immune rsp-activating signal transduction                                                          |          | 8.90e-03 | 0    | 10   |
| 136  | 8.8  | 6 | GO:0002822 | reg. of adaptive immune rsp. based on somatic recomb. of immune rx. built w/Ig superfamily domains | *        | 6.60e-05 | 0    | 13   |
| 134  | 8.2  | 7 | GO:0050863 | regulation of T cell activation                                                                    |          | 3.21e-02 | 0    | 12   |
| 128  | 9.7  | 2 | GO:0019882 | antigen processing and presentation                                                                | *        | 2.61e-08 | 0    | 20   |
| 125  | 8.8  | 6 | GO:0002706 | reg. of lymphocyte mediated immunity                                                               | *        | 8.72e-04 | 0    | 12   |
| 120  | 8.5  | 5 | GO:0002699 | positive reg. of immune effector process                                                           | *        | 8.36e-04 | 0    | 11   |
| 68   | 9.2  | 4 | GO:0002274 | myeloid leukocyte activation                                                                       |          | 1.51e-02 | 0    | 9    |
| 61   | 9.0  | 6 | GO:0002705 | pos. reg. of leukocyte mediated immunity                                                           | *        | 6.13e-04 | 0    | 10   |
| 58   | 10.3 | 3 | GO:0048002 | antigen processing/present of peptide Ag                                                           | *        | 4.17e-06 | 0    | 14   |
| 51   | 9.2  | 6 | GO:0002821 | pos. reg. of adaptive immune response                                                              | *        | 4.03e-04 | 0    | 10   |
| 48   | 9.2  | 7 | GO:0002824 | +reg. of adaptive immune rsp based on somatic recomb. of immune rx. built w/Ig superfamily domains | *        | 4.03e-04 | 0    | 10   |
| 44   | 9.2  | 7 | GO:0002708 | +reg. of lymphocyte mediated immunity                                                              | *        | 6.13e-04 | 0    | 10   |
| 40   | 8.3  | 6 | GO:0002768 | immune rsp.-reg. cell surface rx. sig. pw.                                                         |          | 4.18e-02 | 0    | 8    |
| 37   | 9.7  | 7 | GO:0002709 | regulation of T cell mediated immunity                                                             | *        | 2.94e-03 | 0    | 8    |
| 28   | 8.3  | 8 | GO:0002429 | immune rsp.-activate cell surface rx sig. pw.                                                      |          | 4.18e-02 | 0    | 8    |
| 17   | 11.1 | 4 | GO:0002474 | a.p.p. of peptide antigen via MHC class I                                                          | *        | 4.95e-04 | 0    | 9    |
| 16   | 9.9  | 5 | GO:0001912 | +reg. of leukocyte mediated cytotoxicity                                                           | *        | 2.23e-02 | 0    | 7    |

|    |      |    |            |                                                                          |          |          |    |    |
|----|------|----|------------|--------------------------------------------------------------------------|----------|----------|----|----|
| 13 | 10.2 | 8  | GO:0002711 | pos. reg. of T cell mediated immunity                                    | *        | 9.07e-04 | 0  | 8  |
| 11 | 11.8 | 4  | GO:0032611 | interleukin-1 $\beta$ production                                         | 2.06e-03 |          | 5  | 0  |
| 10 | 10.3 | 6  | GO:0030316 | osteoclast differentiation                                               | 3.51e-02 |          | 8  | 0  |
| 9  | 10.5 | 3  | GO:0019884 | a.p.p. of exogenous antigen                                              | 4.39e-02 | 6.77e-05 | 3  | 12 |
| 9  | 10.6 | 8  | GO:0001914 | regulation of T cell mediated cytotoxicity                               | *        | 6.27e-03 | 0  | 7  |
| 8  | 8.9  | 6  | GO:0032680 | regulation of TNF production                                             | *        | 6.27e-03 | 0  | 8  |
| 8  | 9.1  | 5  | GO:0034341 | response to interferon- $\gamma$                                         | 1.56e-02 |          | 6  | 0  |
| 8  | 10.0 | 5  | GO:0032653 | regulation of interleukin-10 production                                  |          | 3.53e-02 | 0  | 4  |
| 7  | 9.0  | 5  | GO:0032675 | regulation of interleukin-6 production                                   | *        | 4.93e-02 | 0  | 7  |
| 7  | 10.8 | 4  | GO:0002478 | a.p.p. of exogenous peptide antigen                                      | *        | 9.06e-04 | 0  | 9  |
| 3  | 10.8 | 9  | GO:0001916 | + reg. of cytotoxicity via T cell                                        | 5.40e-03 | 3.16e-03 | 6  | 7  |
| 2  | 9.4  | 6  | GO:0032755 | + reg. of interleukin-6 production                                       | 3.81e-04 | 7.26e-03 | 12 | 7  |
| 2  | 9.4  | 7  | GO:0032760 | + reg. of TNF production                                                 | 7.91e-05 | 4.80e-03 | 14 | 7  |
| 2  | 9.6  | 6  | GO:0032729 | + reg. of interferon- $\gamma$ production                                | 4.00e-02 |          | 7  | 0  |
| 2  | 11.2 | 9  | GO:0002726 | + reg. of T cell cytokine production                                     | 3.87e-02 |          | 4  | 0  |
| 2  | 11.9 | 5  | GO:0042590 | a.p.p. of peptide antigen w/MHC class I                                  | 1.67e-02 |          | 4  | 0  |
| 1  | 11.3 | 9  | GO:0045651 | + reg. of macrophage differentiation                                     | 3.44e-02 |          | 5  | 0  |
| 0  | 10.6 | 11 | GO:0050718 | + reg. of interleukin-1 $\beta$ secretion                                | 1.94e-04 |          | 9  | 0  |
| 0  | 11.2 | 5  | GO:0019886 | a.p.p. of peptide antigen w/MHC class II                                 | 4.74e-02 |          | 5  | 0  |
| 0  | 12.8 | 7  | GO:0002485 | a.p.p. of endogenous peptide antigen w/MHC-I w/ER pathway, TAP-dependent | 4.39e-02 |          | 3  | 0  |

**Table 1. GOATOOLS compared to the older DAVID6.7 for the Gjoneska Consistent Increase cluster for immune GO terms.** GOATOOLS finds more specific GO terms than the older version of DAVID. Specific GO terms are at the bottom of the table. Broad GO terms are at the top of the table. An asterisk (“\*”) in the GOATOOL P-value column means that although the GO term was not found statistically significant by GOATOOLS, a more specific descendant term was found statistically significant by GOATOOLS. The numbers in the dcnt column are descendant counts as counted using both the *is\_a* attribute and relationships like *part\_of* and *regulates*. The info column contains *information content* using the MGI annotations. The numbers under the column “/125” are counts of Gjoneska genes associated with GO terms found significant by GOATOOLS. The numbers under the “/113” column are counts of Gjoneska genes associated with GO terms found significant by DAVID6.7. The total amount of genes related to significant immune GO terms in the Gjoneska *Consistent Increase* is 125 for GOATOOLS and 113 for DAVID6.7.

Immune Summary in the *Consistent Increase* Gjoneska cluster with DAVID version 6.8 released Oct 2016

| dcnt | info | D  | GO         | Description                                                                    | GOATOOL  | DAVID6.8 | /125 | /119 |
|------|------|----|------------|--------------------------------------------------------------------------------|----------|----------|------|------|
| 1796 | 6.4  | 1  | GO:0002376 | immune system process                                                          | 5.28e-07 | 2.40e-18 | 64   | 61   |
| 835  | 6.9  | 2  | GO:0006955 | immune response                                                                | 7.84e-04 | 4.75e-04 | 18   | 21   |
| 464  | 7.4  | 4  | GO:0001817 | regulation of cytokine production                                              | 7.84e-04 | *        | 8    | 0    |
| 288  | 7.5  | 4  | GO:0045087 | innate immune response                                                         | 3.50e-07 | 2.83e-12 | 51   | 49   |
| 226  | 8.5  | 3  | GO:0002250 | adaptive immune response                                                       | 4.36e-03 | 3.90e-03 | 13   | 14   |
| 189  | 7.9  | 4  | GO:0006954 | inflammatory response                                                          | 5.09e-07 | 2.95e-09 | 41   | 39   |
| 17   | 11.1 | 4  | GO:0002474 | a.p.p. of peptide antigen via MHC class I                                      | *        | 5.16e-04 | 0    | 9    |
| 11   | 11.8 | 4  | GO:0032611 | interleukin-1 $\beta$ production                                               | 2.06e-03 | 2.20e-02 | 5    | 5    |
| 10   | 10.3 | 6  | GO:0030316 | osteoclast differentiation                                                     | 3.51e-02 |          | 8    | 0    |
| 9    | 10.5 | 3  | GO:0019884 | a.p.p. of exogenous antigen                                                    | 4.39e-02 |          | 3    | 0    |
| 8    | 9.1  | 5  | GO:0034341 | response to interferon- $\gamma$                                               | 1.56e-02 | 2.01e-02 | 6    | 7    |
| 4    | 9.3  | 6  | GO:0071346 | cellular response to interferon- $\gamma$                                      |          | 1.81e-03 | 0    | 11   |
| 3    | 10.8 | 9  | GO:0001916 | + reg. of cytotoxicity via T cell                                              | 5.40e-03 | 3.70e-03 | 6    | 7    |
| 2    | 9.4  | 6  | GO:0032755 | + reg. of interleukin-6 production                                             | 3.81e-04 | 6.86e-04 | 12   | 12   |
| 2    | 9.4  | 7  | GO:0032760 | + reg. of TNF production                                                       | 7.91e-05 | 1.73e-04 | 14   | 14   |
| 2    | 9.6  | 6  | GO:0032729 | + reg. of interferon- $\gamma$ production                                      | 4.00e-02 |          | 7    | 0    |
| 2    | 11.2 | 9  | GO:0002726 | + reg. of T cell cytokine production                                           | 3.87e-02 |          | 4    | 0    |
| 2    | 11.9 | 5  | GO:0042590 | a.p.p. of peptide antigen w/MHC class I                                        | 1.67e-02 |          | 4    | 0    |
| 1    | 11.3 | 9  | GO:0045651 | + reg. of macrophage differentiation                                           | 3.44e-02 |          | 5    | 0    |
| 0    | 10.6 | 11 | GO:0050718 | + reg. of interleukin-1 $\beta$ secretion                                      | 1.94e-04 | 9.09e-03 | 9    | 7    |
| 0    | 11.2 | 5  | GO:0019886 | a.p.p. of peptide antigen w/MHC class II                                       | 4.74e-02 |          | 5    | 0    |
| 0    | 12.8 | 7  | GO:0002485 | a.p.p. of endogenous peptide antigen w/MHC class I w/ER pathway, TAP-dependent | 4.39e-02 |          | 3    | 0    |

**Table 2. GOATOOLS compared to the current DAVID6.8 for the Gjoneska *Consistent Increase* cluster for immune GO terms.** GOATOOLS finds more specific GO terms than DAVID6.8. Specific GO terms are at the bottom of the table. Broad GO terms are at the top of the table. An asterisk (“\*”) in the GOATOOL or DAVID6.8 P-value columns means that although the GO term was not found statistically significant, a more specific descendant term was found statistically significant. The numbers in the dcnt column are descendant counts as counted using both the *is\_a* attribute and relationships like *part\_of* and *regulates*. The info column contains *information content* using the MGI annotations. The numbers under the column “/125” are counts of Gjoneska genes associated with GO terms found significant by GOATOOLS. The numbers under the “/119” column are counts of Gjoneska genes associated with GO terms found significant by DAVID6.8. The total amount of genes related to significant immune GO terms in the Gjoneska *Consistent Increase* is 125 for GOATOOLS and 119 for DAVID6.8

Immune Summary in the *Consistent Increase* Gjoneska cluster with GOstats from Sep 2016

| dcnt | info | D  | GO         | Description                                                      | GOATOOL  | GOstats  | /125 | /212 |
|------|------|----|------------|------------------------------------------------------------------|----------|----------|------|------|
| 1796 | 6.4  | 1  | GO:0002376 | immune system process                                            | 5.28e-07 | *        | 64   | 0    |
| 835  | 6.9  | 2  | GO:0006955 | immune response                                                  | 7.84e-04 | 2.49e-02 | 18   | 126  |
| 495  | 12.2 | 4  | GO:0002520 | immune system development                                        | *        | 1.84e-06 | 0    | 75   |
| 464  | 7.4  | 4  | GO:0001817 | regulation of cytokine production                                | 7.84e-04 | *        | 8    | 0    |
| 443  | 7.8  | 3  | GO:0045321 | leukocyte activation                                             |          | 4.68e-03 | 0    | 72   |
| 288  | 7.5  | 4  | GO:0045087 | innate immune response                                           | 3.50e-07 | 3.15e-08 | 51   | 72   |
| 247  | 7.4  | 5  | GO:0002694 | regulation of leukocyte activation                               |          | 3.86e-02 | 0    | 43   |
| 226  | 8.5  | 3  | GO:0002250 | adaptive immune response                                         | 4.36e-03 | 5.68e-05 | 13   | 45   |
| 189  | 7.9  | 4  | GO:0006954 | inflammatory response                                            | 5.09e-07 | 3.20e-06 | 41   | 60   |
| 179  | 7.9  | 6  | GO:0002253 | activation of immune response                                    |          | 1.14e-03 | 0    | 35   |
| 166  | 7.9  | 5  | GO:1903706 | regulation of hemopoiesis                                        | *        | 3.60e-03 | 0    | 39   |
| 159  | 8.1  | 5  | GO:0002764 | immune rsp-regulating signaling pathway                          |          | 1.16e-04 | 0    | 29   |
| 149  | 8.9  | 3  | GO:0002263 | cell activation in immune response                               |          | 2.25e-03 | 0    | 23   |
| 128  | 9.7  | 2  | GO:0019882 | antigen processing and presentation                              | *        | 3.86e-02 | 0    | 24   |
| 82   | 10.9 | 4  | GO:0002444 | myeloid leukocyte mediated immunity                              |          | 3.71e-02 | 0    | 11   |
| 76   | 8.7  | 6  | GO:0002695 | negative regulation of leukocyte activation                      |          | 4.19e-02 | 0    | 16   |
| 75   | 10.6 | 5  | GO:0071887 | leukocyte apoptotic process                                      |          | 3.24e-02 | 0    | 18   |
| 56   | 8.4  | 5  | GO:0070663 | regulation of leukocyte proliferation                            |          | 2.79e-02 | 0    | 18   |
| 48   | 9.2  | 7  | GO:0002824 | +reg. of somatic recomb. of Ig immune rx.                        | *        | 1.58e-06 | 0    | 16   |
| 47   | 9.6  | 4  | GO:0001910 | reg. of leukocyte mediated cytotoxicity                          | *        | 1.16e-02 | 0    | 10   |
| 44   | 9.2  | 7  | GO:0002708 | +reg. of lymphocyte mediated immunity                            | *        | 1.84e-06 | 0    | 17   |
| 41   | 8.8  | 7  | GO:1902107 | +reg. of leukocyte differentiation                               | *        | 9.69e-05 | 0    | 20   |
| 38   | 9.9  | 9  | GO:2000514 | regulation of CD4+, $\alpha$ - $\beta$ T cell activation         |          | 5.73e-03 | 0    | 8    |
| 37   | 9.7  | 7  | GO:0002709 | regulation of T cell mediated immunity                           | *        | 5.68e-05 | 0    | 12   |
| 28   | 8.3  | 8  | GO:0002429 | immune rsp.-activ. cell surface rx. sig. pw.                     |          | 1.69e-02 | 0    | 18   |
| 26   | 8.9  | 5  | GO:1903555 | reg. of TNF superfamily cytokine prod.                           | *        | 2.55e-04 | 0    | 18   |
| 17   | 11.1 | 4  | GO:0002474 | a.p.p. of peptide antigen via MHC class I                        | *        | 7.88e-04 | 0    | 15   |
| 15   | 11.4 | 3  | GO:0019883 | a.p.p. of endogenous antigen                                     | *        | 2.25e-03 | 0    | 7    |
| 11   | 11.8 | 4  | GO:0032611 | interleukin-1 $\beta$ production                                 | 2.06e-03 | *        | 5    | 0    |
| 10   | 10.3 | 6  | GO:0030316 | osteoclast differentiation                                       | 3.51e-02 |          | 8    | 0    |
| 9    | 10.5 | 3  | GO:0019884 | a.p.p. of exogenous antigen                                      | 4.39e-02 | *        | 3    | 0    |
| 8    | 9.1  | 5  | GO:0034341 | response to interferon- $\gamma$                                 | 1.56e-02 | *        | 6    | 0    |
| 8    | 10.3 | 9  | GO:0050704 | regulation of interleukin-1 secretion                            | *        | 2.25e-03 | 0    | 7    |
| 7    | 11.9 | 5  | GO:0019885 | a.p.p. of endog. peptide antigen via MHC-I                       | *        | 5.14e-03 | 0    | 6    |
| 5    | 12.5 | 6  | GO:0071593 | lymphocyte aggregation                                           |          | 7.70e-08 | 0    | 46   |
| 4    | 9.3  | 6  | GO:0071346 | cellular response to interferon- $\gamma$                        |          | 3.85e-02 | 0    | 8    |
| 3    | 10.8 | 9  | GO:0001916 | + reg. of cytotoxicity via T cell                                | 5.40e-03 | 2.22e-04 | 6    | 8    |
| 2    | 9.4  | 6  | GO:0032755 | + reg. of interleukin-6 production                               | 3.81e-04 | 8.45e-04 | 12   | 12   |
| 2    | 9.4  | 7  | GO:0032760 | + reg. of TNF production                                         | 7.91e-05 | 1.37e-04 | 14   | 15   |
| 2    | 9.6  | 6  | GO:0032729 | + reg. of interferon- $\gamma$ production                        | 4.00e-02 | 3.85e-02 | 7    | 9    |
| 2    | 10.1 | 6  | GO:0032757 | + reg. of interleukin-8 production                               |          | 1.93e-02 | 0    | 8    |
| 2    | 10.4 | 6  | GO:0032733 | + reg. of interleukin-10 production                              |          | 3.86e-02 | 0    | 7    |
| 2    | 11.2 | 9  | GO:0002726 | + reg. of T cell cytokine production                             | 3.87e-02 | 2.16e-02 | 4    | 5    |
| 2    | 11.9 | 5  | GO:0042590 | a.p.p. of peptide antigen w/MHC class I                          | 1.67e-02 | 2.16e-02 | 4    | 4    |
| 1    | 11.3 | 9  | GO:0045651 | + reg. of macrophage differentiation                             | 3.44e-02 | 1.97e-02 | 5    | 5    |
| 0    | 10.6 | 11 | GO:0050718 | + reg. of interleukin-1 $\beta$ secretion                        | 1.94e-04 | 8.04e-04 | 9    | 7    |
| 0    | 11.2 | 5  | GO:0019886 | a.p.p. of peptide antigen w/MHC class II                         | 4.74e-02 | 2.88e-02 | 5    | 5    |
| 0    | 12.8 | 7  | GO:0002485 | a.p.p. of endog. peptide antigen w/MHC-I w/ER pw., TAP-dependent | 4.39e-02 |          | 3    | 0    |

**Table 3. GOATOOLS compared to GOstats.** Specific GO terms found by both GOATOOLS and GOstats had similar number of associated genes. Broad GO terms found by both showed GOstats was associated with more genes than GOATOOLS, indicating that the original annotations were augmented by propagating counts. See captions in S1 or S2 for table column descriptions.

| Method     | Category         | GOATOOLS | DAV6.8 | GD  | G   | D  | Gjoneska Cluster |
|------------|------------------|----------|--------|-----|-----|----|------------------|
| fdr_bh     | GOTERM_BP_DIRECT | 124      | 100    | 100 | 24  | 0  | Transient Inc.   |
| fdr_bh     | GOTERM_BP_DIRECT | 48       | 29     | 29  | 19  | 0  | Consistent Inc.  |
| fdr_bh     | GOTERM_BP_DIRECT | 135      | 53     | 53  | 82  | 0  | Late Inc.        |
| fdr_bh     | GOTERM_BP_DIRECT | 21       | 14     | 14  | 7   | 0  | Consistent Dec.  |
| fdr_bh     | GOTERM_BP_DIRECT | 69       | 54     | 54  | 15  | 0  | Late Dec.        |
| fdr_bh     | GOTERM_BP_ALL    | 598      | 399    | 399 | 199 | 0  | Transient Inc.   |
| fdr_bh     | GOTERM_BP_ALL    | 515      | 334    | 334 | 181 | 0  | Consistent Inc.  |
| fdr_bh     | GOTERM_BP_ALL    | 1274     | 760    | 758 | 516 | 2  | Late Inc.        |
| fdr_bh     | GOTERM_BP_ALL    | 215      | 178    | 167 | 48  | 11 | Consistent Dec.  |
| fdr_bh     | GOTERM_BP_ALL    | 560      | 449    | 448 | 112 | 1  | Late Dec.        |
| bonferroni | GOTERM_BP_DIRECT | 67       | 44     | 44  | 23  | 0  | Transient Inc.   |
| bonferroni | GOTERM_BP_DIRECT | 25       | 16     | 16  | 9   | 0  | Consistent Inc.  |
| bonferroni | GOTERM_BP_DIRECT | 29       | 14     | 14  | 15  | 0  | Late Inc.        |
| bonferroni | GOTERM_BP_DIRECT | 5        | 5      | 5   | 0   | 0  | Consistent Dec.  |
| bonferroni | GOTERM_BP_DIRECT | 31       | 22     | 22  | 9   | 0  | Late Dec.        |
| bonferroni | GOTERM_BP_ALL    | 270      | 227    | 227 | 43  | 0  | Transient Inc.   |
| bonferroni | GOTERM_BP_ALL    | 169      | 121    | 121 | 48  | 0  | Consistent Inc.  |
| bonferroni | GOTERM_BP_ALL    | 403      | 268    | 267 | 136 | 1  | Late Inc.        |
| bonferroni | GOTERM_BP_ALL    | 114      | 103    | 99  | 15  | 4  | Consistent Dec.  |
| bonferroni | GOTERM_BP_ALL    | 252      | 216    | 216 | 36  | 0  | Late Dec.        |

**Table 4. GOATOOLS found more statistically significant GO terms than found by DAVID6.8 when using the same annotations.** The annotations used in the GOATOOLS GOEAs shown here were downloaded from DAVID6.8. GOATOOLS ran *Fisher's exact test* and both the *Bonferroni* and *Benjamini-Hochberg* multiple test corrections. Annotation sets downloaded from DAVID6.8 include GOTERM\_BP\_DIRECT and GOTERM\_BP\_ALL. GOTERM\_BP\_DIRECT is new in DAVID6.8 and provides GO mappings directly annotated by the source database. GOTERM\_BP\_ALL augments the original annotations by propagating parent GO terms up the hierarchy. GOATOOLS' Benjamini-Hochberg scores are compared against DAVID6.8's Benjamini scores. GOATOOLS' Bonferroni scores are compared against DAVID6.8's Bonferroni scores. The number of GO terms found statistically enriched ( $\alpha=0.05$ ) for GOATOOLS and DAVID6.8 is under column headers *GOATOOLS* and *DAV6.8*. The number of GO terms found enriched by both GOATOOLS and DAVID6.8 is listed in the *GD* column. The number of GO terms found only by GOATOOLS is listed in the *G* column. The number of GO terms found only by DAVID6.8 is listed in the *D* column. The last column contains Gjoneska clusters of genes found up-regulated (Inc. for Increase) or down-regulated (Dec. for Decrease) across three different time periods (Transient, Consistent, or Late).

## Supplemental Figures

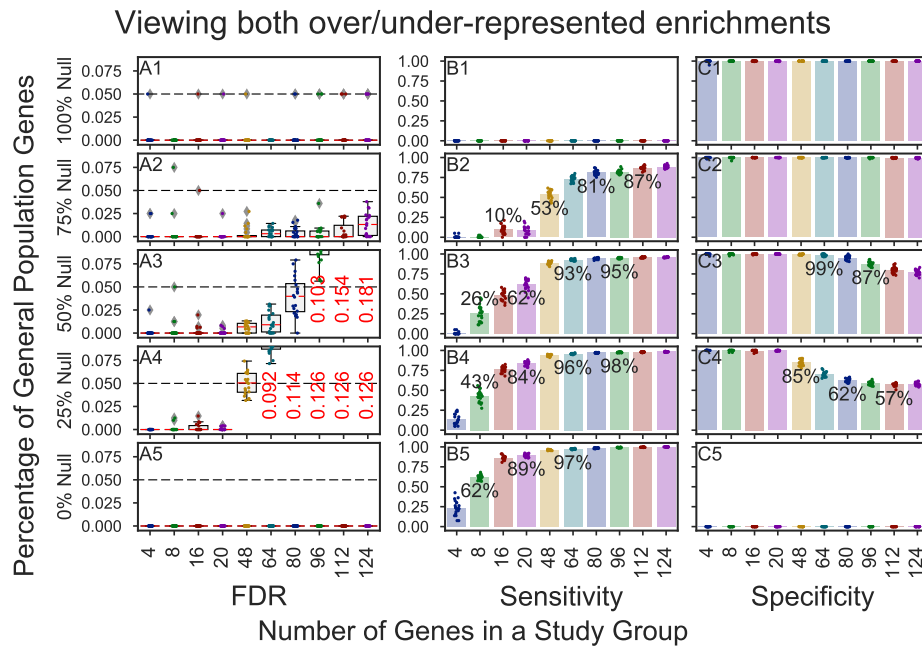

**Figure 1.** The first GOATOOLS GOEA simulations fail in panels A3 and A4 with FDR values exceeding the alpha of 0.05 set by the researcher. The values of failing FDRs are shown using red text. The source of the failures were false positives for GO terms annotated with large numbers of gene products. For mouse annotations in the *biological\_process* branch, GO terms annotated with 1,000 or more genes were the source of failures.

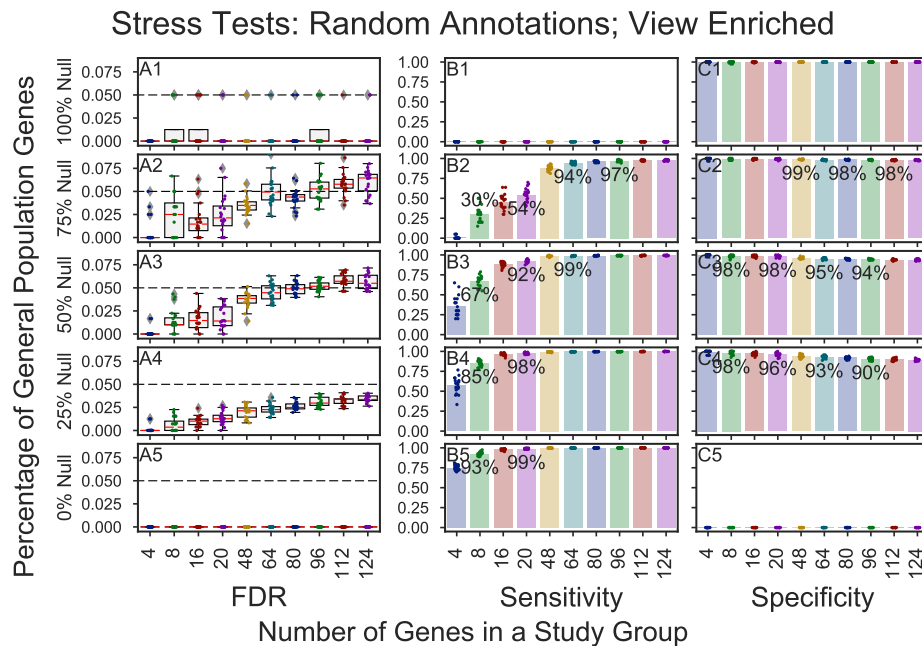

**Figure 2.** GOATOOLS GOEAs stress tests with randomly shuffled associations nearly pass if only enriched GO terms are viewed. The associations are randomly shuffled while still maintaining the distribution number of GO terms per gene. The failing FDRs (above 0.05) are seen in panels A2 and A3 for gene groups having 96, 112, or 124 genes.

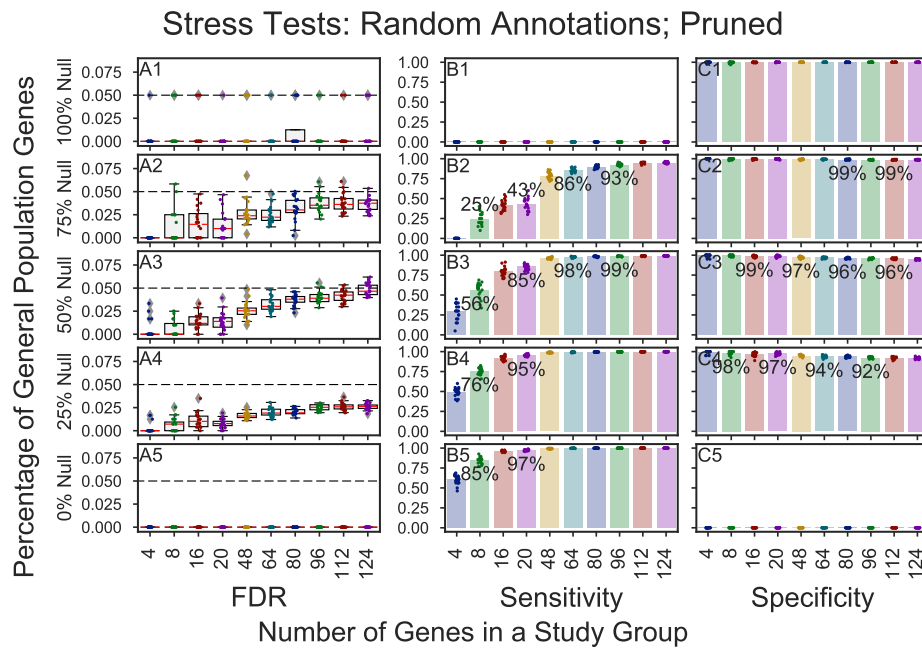

**Figure 3. GOATOOLS GOEAs stress tests with randomly shuffled associations pass for all cases if only 30 out of over 17k+ GO terms associated with more than 1000 genes are removed.** The median number of genes per GO term in the mouse associations is 3 genes/GO. Genes per GO term ranges from 1 gene to 7k genes per GO term. (mean=16 genes/GO, SD=128).



## Significant genes minus "cellular process"

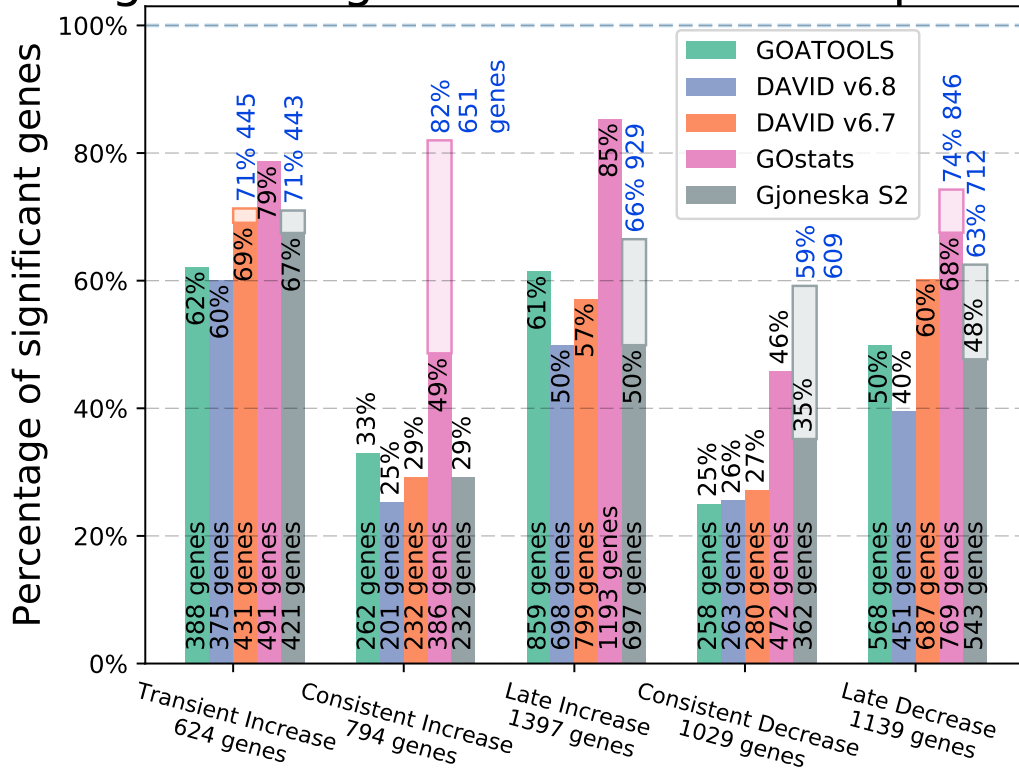

**Figure 4. Removing just one broad GO term can dramatically reduce the percentages of genes associated with statistically significant GO terms.** The GOEA analyses from four different tools plus the Gjoneska DAVID6.7 GOEA results stored in Gjoneska's Supplemental Table 2 found significant GO IDs for five of the six Gjoneska gene clusters using the Gjoneska population background of 13,838 genes. The x-axis shows the five Gjoneska clusters and the total count of genes found to be up or down regulated in the Gjoneska experiments. The solid bars and their black text show the percentage and number of significant genes in the GOEA analyses if *cellular process* is excluded. The faded bars above the solid bars and the associated blue text show the percentage and number of significant genes in the original analyses if *cellular process* is included. The difference in the solid and faded bars shows the affect of removing just one extremely broad GO term, *cellular process*. The color of each bar represents a GOEA tool as specified in the legend. The height of each bar is the percentage of genes in each cluster that are found to be associated with significant GO IDs. It may be desirable to remove GO terms from GEOA analyses that are both broad and are associated with large numbers of genes.
